# Supplementary material for: Fluvastatin and Perioperative Events in Patients Undergoing Vascular Surgery
Source: Atypon-hosted journal article supplement (doi:10.1056/nejmoa0808207), 2009-09-02

## Supplementary Appendix

This appendix has been provided by the authors to give readers additional information about their work.

Supplement to: Schouten O, Boersma E, Hoeks SE, et al. Fluvastatin and perioperative events in patients undergoing vascular surgery. *N Engl J Med* 2009;361:980-9.

**Fluvastatin and perioperative events in patients  
undergoing vascular surgery**

**Online Supplementary Appendix**

Olaf Schouten M.D. Ph.D.<sup>1</sup>, Eric Boersma Ph.D.<sup>2</sup>, Sanne E. Hoeks MSc<sup>2</sup>, Robbert Benner Ph.D.<sup>3</sup>, Hero van Urk M.D. Ph.D.<sup>1</sup>, Marc R.H.M. van Sambeek M.D. Ph.D.<sup>1,4</sup>, Hence J.M. Verhagen M.D. Ph.D.<sup>1</sup>, Nisar A. Khan Ph.D.<sup>3</sup>, Martin Dunkelgrun M.D. Ph.D.<sup>1</sup>, Jeroen J. Bax M.D. Ph.D.<sup>5</sup>, Don Poldermans M.D. Ph.D.<sup>6</sup>, for The Dutch Echocardiographic Cardiac Risk Evaluation Applying Stress Echocardiography Study Group.

Departments of Surgery<sup>1</sup>, Cardiology<sup>2</sup>, Immunology<sup>3</sup>, Anesthesiology<sup>6</sup>, Erasmus Medical Center, Rotterdam, the Netherlands. <sup>4</sup>Department of Surgery, Catharina Hospital, Eindhoven, the Netherlands. <sup>5</sup>Department of Cardiology, Leiden University Medical Center, Leiden, the Netherlands

**Address for correspondence**

Don Poldermans, MD,  
Erasmus Medical Center  
's Gravendijkwal 230, Room H-805  
3015 CE Rotterdam, the Netherlands  
Phone: +31 10 4634613, Fax: +31 10 4634957  
E-mail: d.poldermans@erasmusmc.nl

## Online Supplementary Appendix A

### DECREASE III risk index

|                              |    |                       |
|------------------------------|----|-----------------------|
| <b>AGE</b>                   |    | <b>___ ___ POINTS</b> |
| ≤ 40 years                   | 0  |                       |
| 41 – 50                      | 5  |                       |
| 51 – 60                      | 10 |                       |
| 61 – 70                      | 15 |                       |
| 71 – 80                      | 20 |                       |
| > 80                         | 25 |                       |
| <b>GENDER</b>                |    | <b>___ ___ POINTS</b> |
| Female                       | 0  |                       |
| Male                         | 1  |                       |
| <b>TYPE OF SURGERY</b>       |    | <b>3 0 POINTS</b>     |
| Vascular                     | 30 |                       |
| <b>PROCEDURE</b>             |    | <b>___ ___ POINTS</b> |
| Endovascular                 | 0  |                       |
| Open                         | 5  |                       |
| <b>CLINICAL RISK FACTORS</b> |    | <b>___ ___ POINTS</b> |
| CAD                          | 2  |                       |
| Renal Failure                | 2  |                       |
| DM                           | 5  |                       |
| Hypertension                 | 5  |                       |
| Heart failure                | 10 |                       |
| <b>TOTAL</b>                 |    | <b>___ ___ POINTS</b> |

Online Supplementary Appendix B

DECREASE III CONSORT Diagram

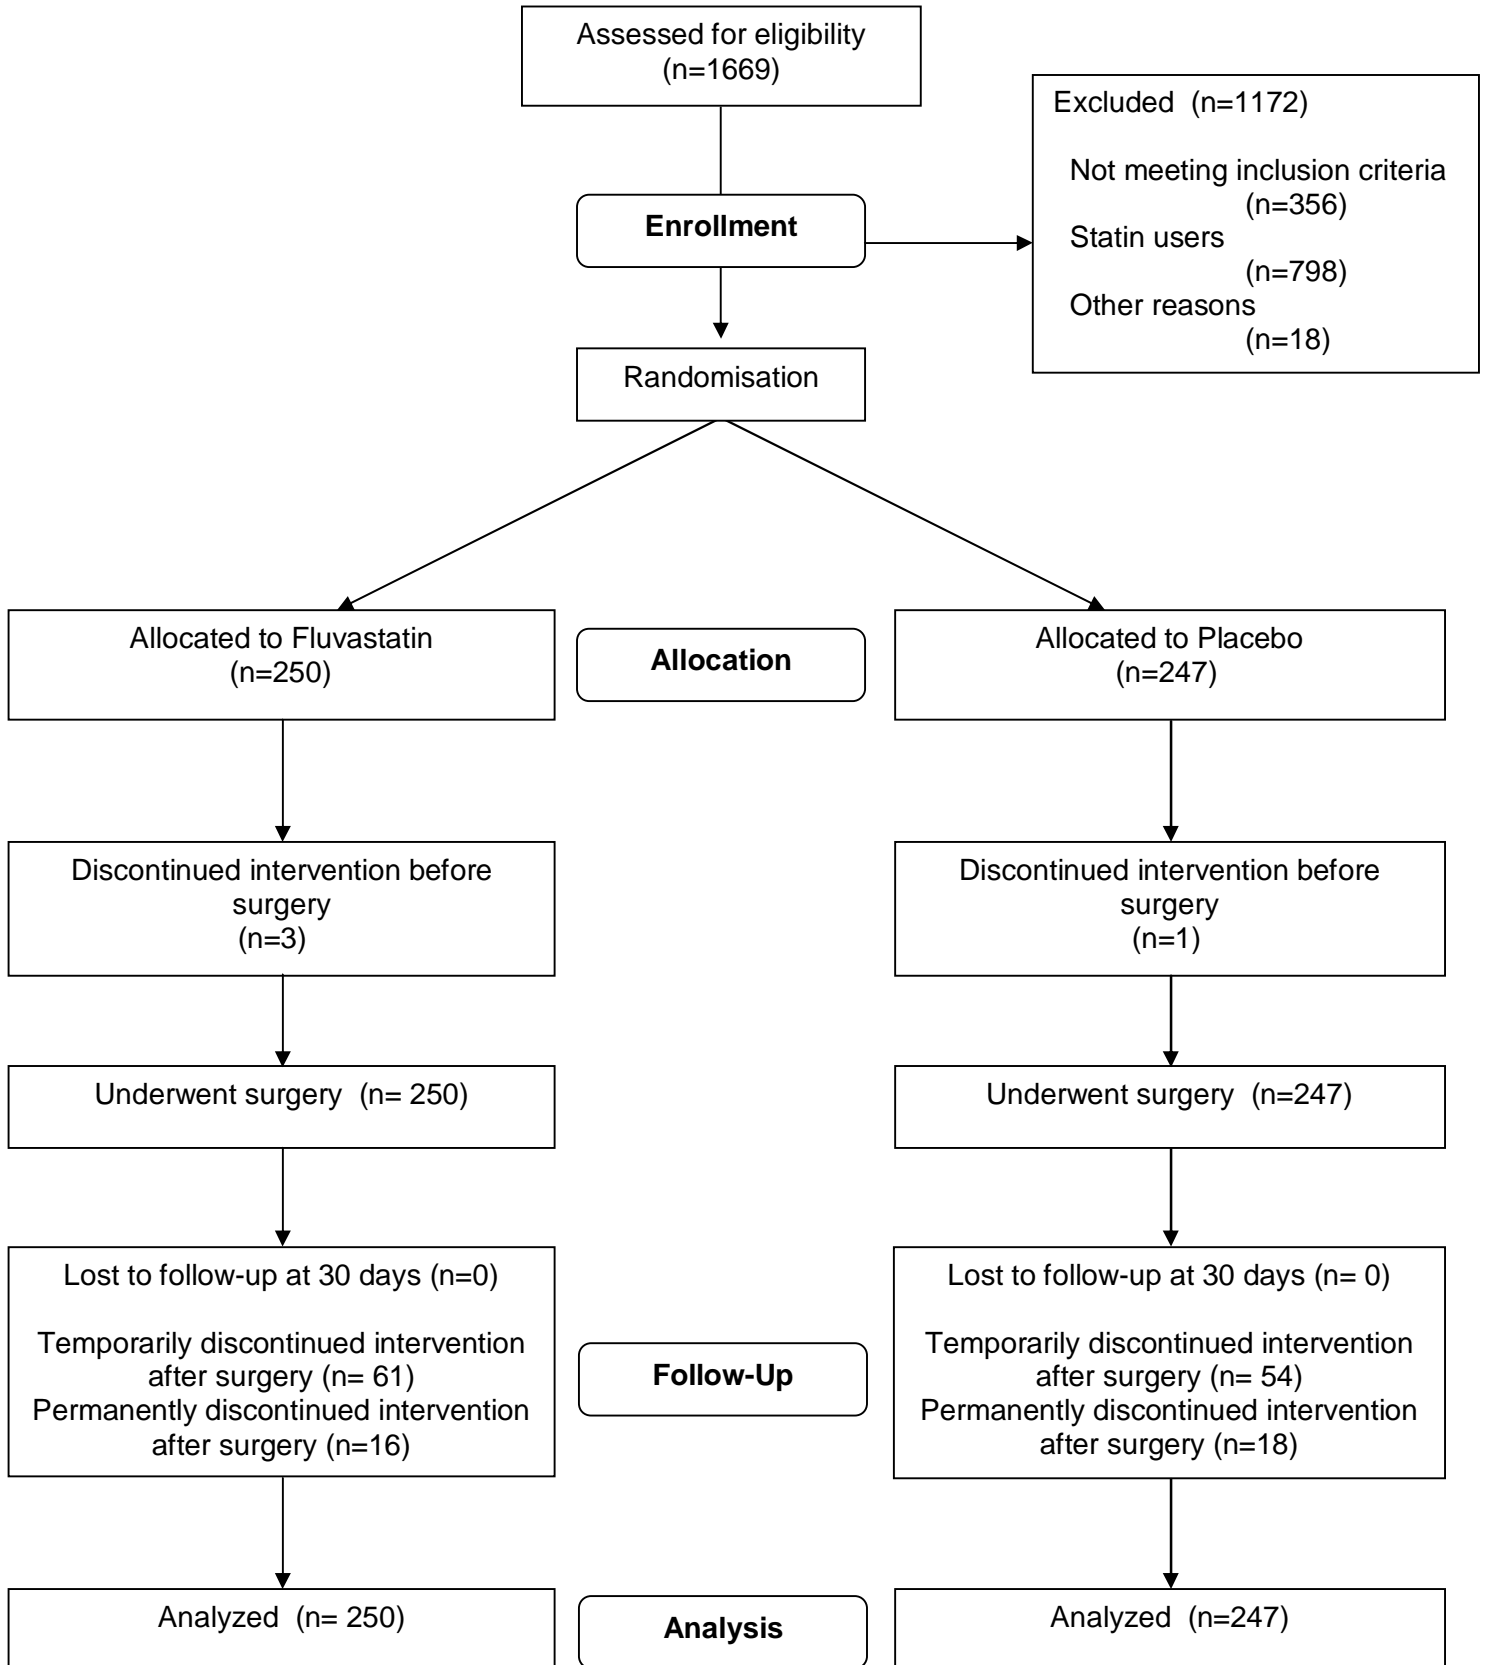

Supplement: nejm_schouten_980sa1.pdf [file nejm_schouten_980sa1.pdf]
